# Supplementary material for: Complete Genomic Characterization and Identification of Saccharomycopsisphalluae sp. nov., a Novel Pathogen Causes Yellow Rot Disease on Phallus rubrovolvatus
Source: MDPI journal article supplement (doi:10.3390/jof7090707), 2021-08-28

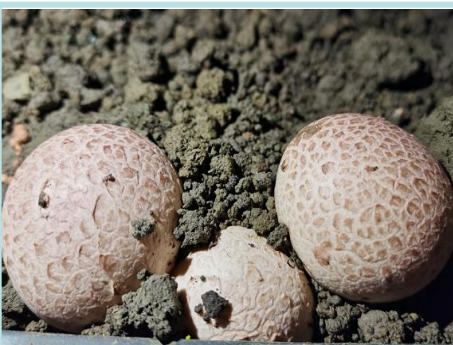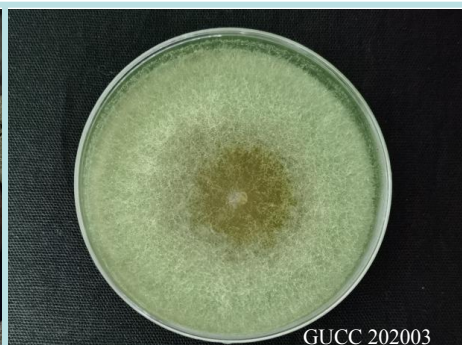

GUCC 202003

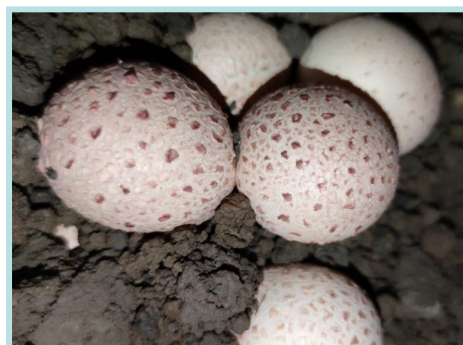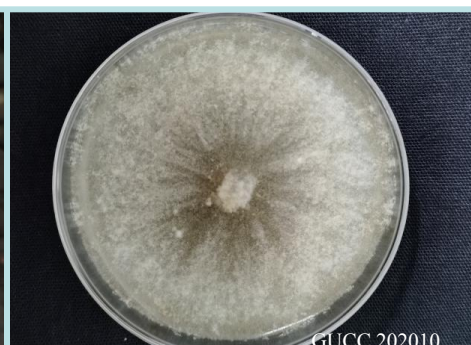

GUCC 202010

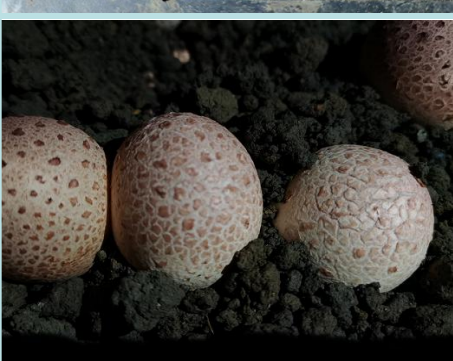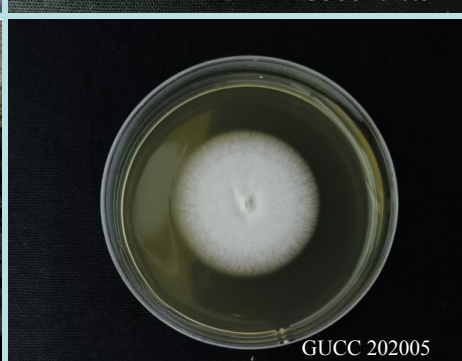

GUCC 202005

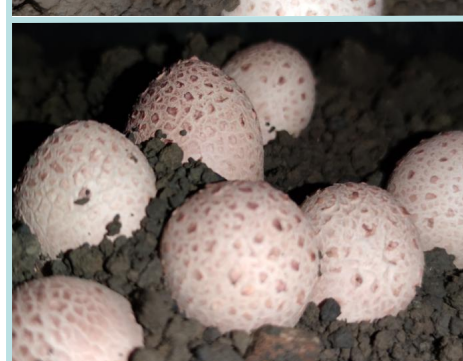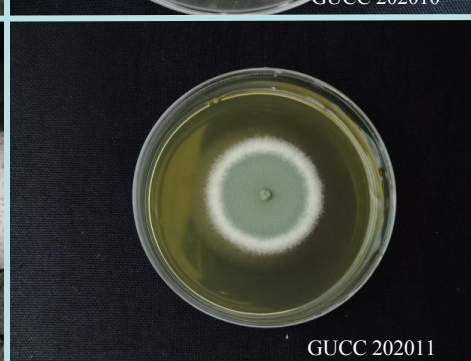

GUCC 202011

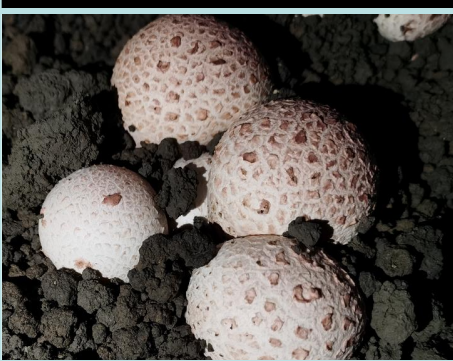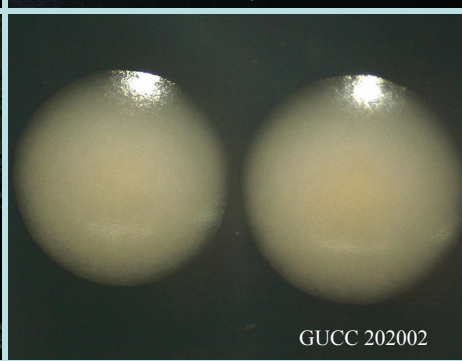

GUCC 202002

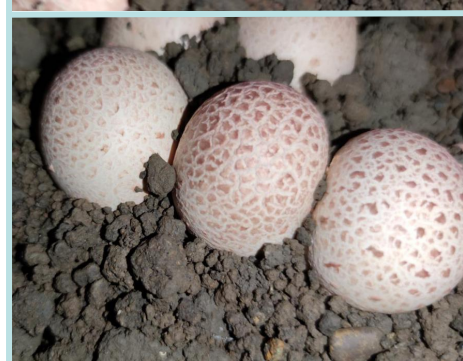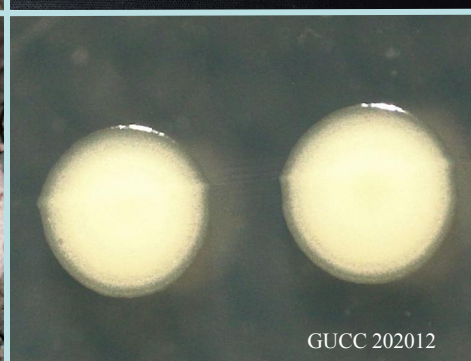

GUCC 202012

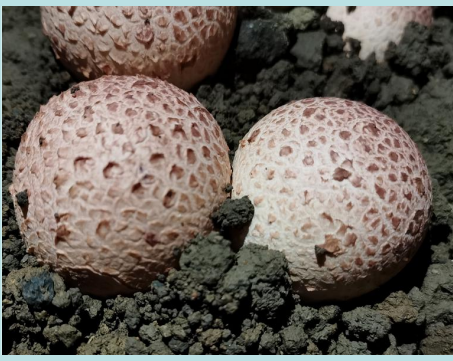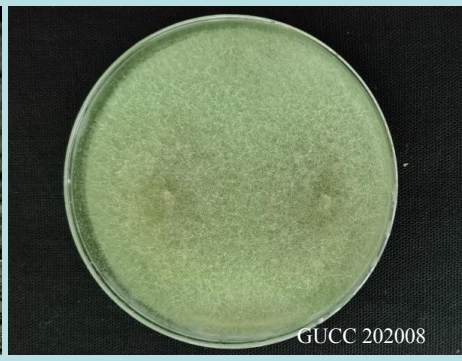

GUCC 202008

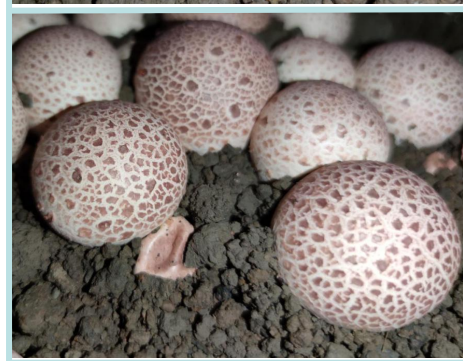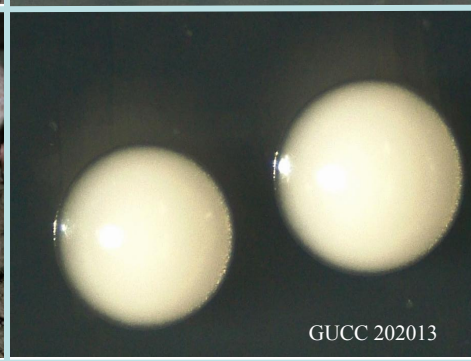

GUCC 202013



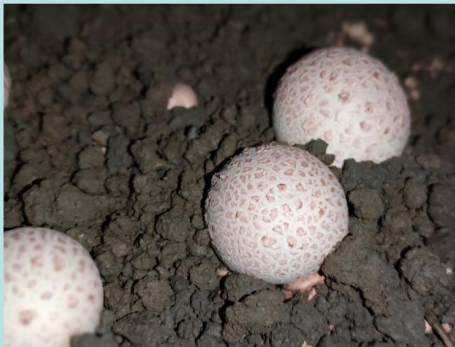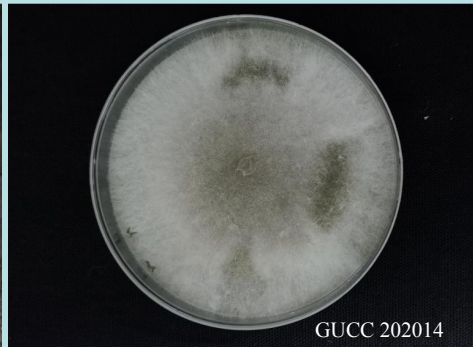

GUCC 202014

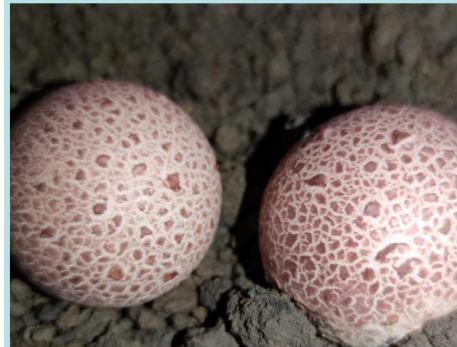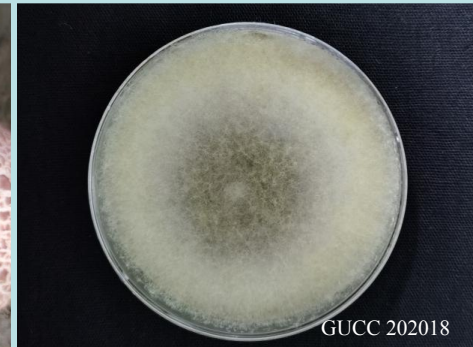

GUCC 202018

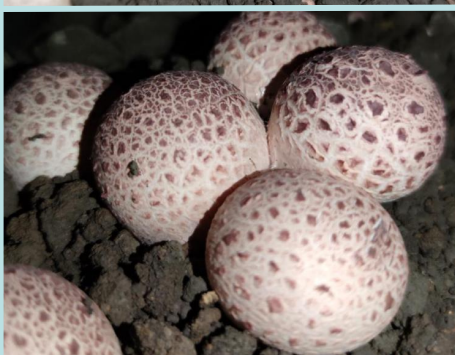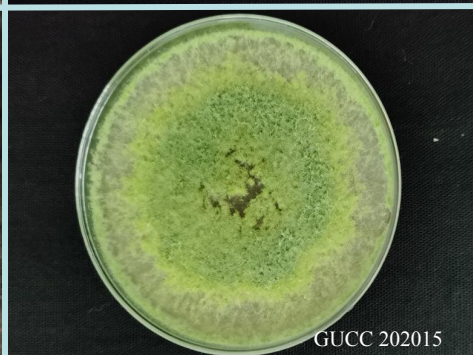

GUCC 202015

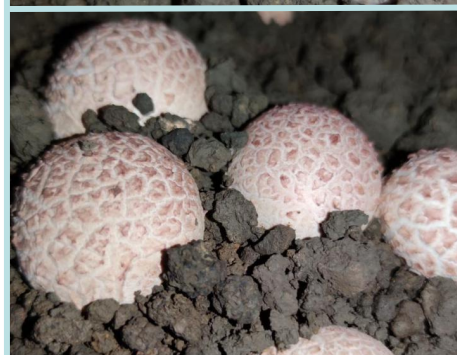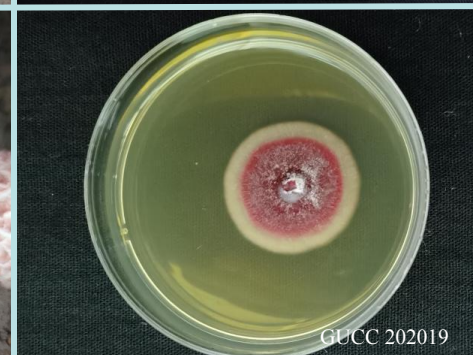

GUCC 202019

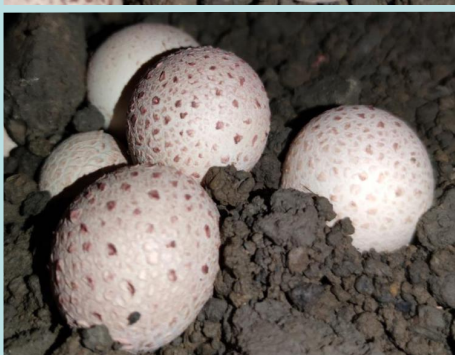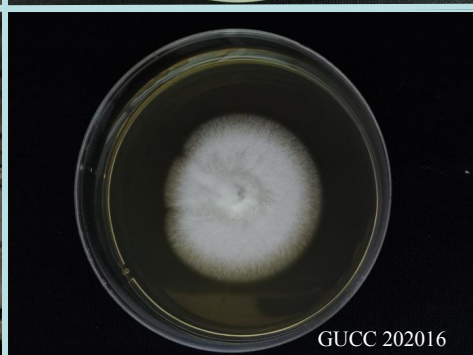

GUCC 202016

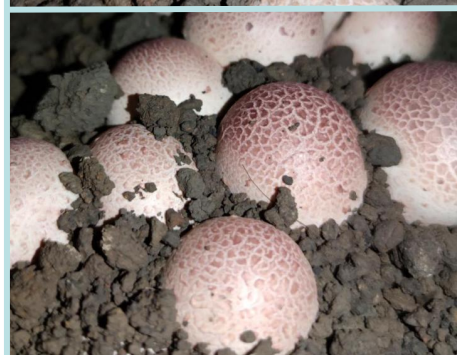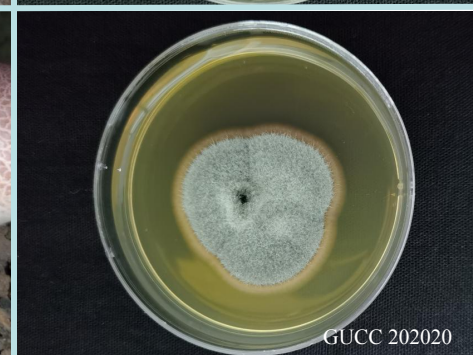

GUCC 202020

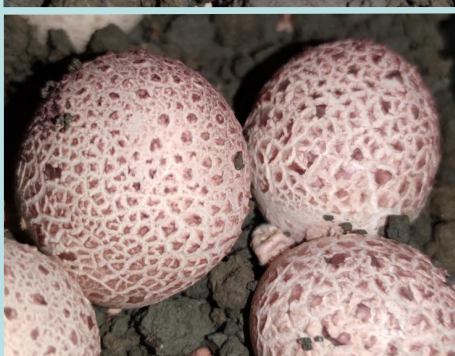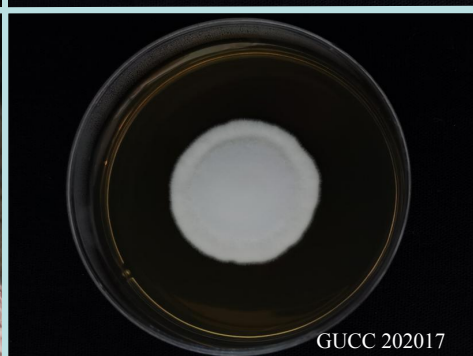

GUCC 202017

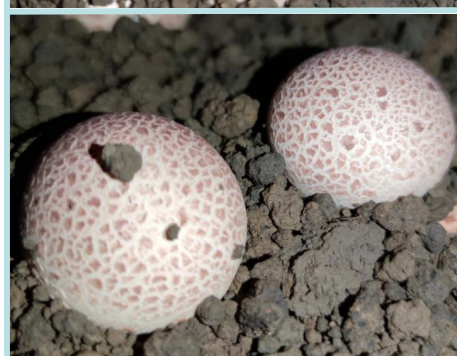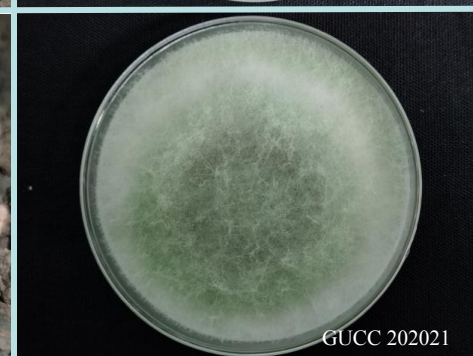

GUCC 202021



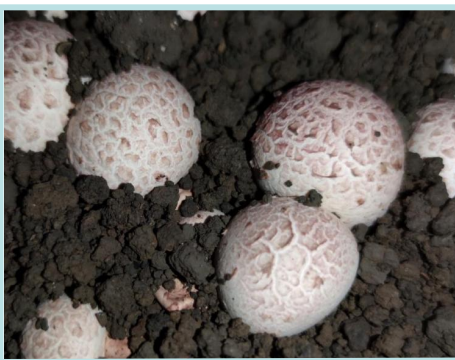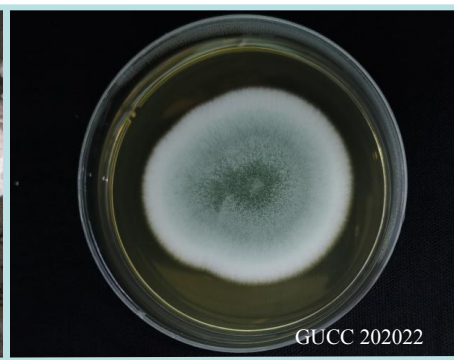

GUCC 202022

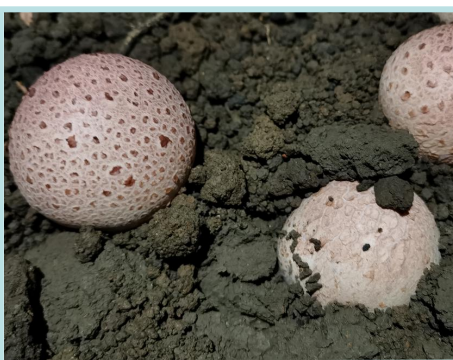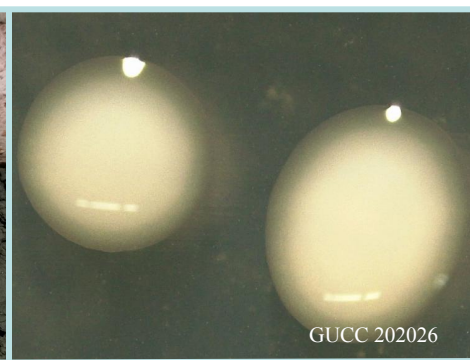

GUCC 202026

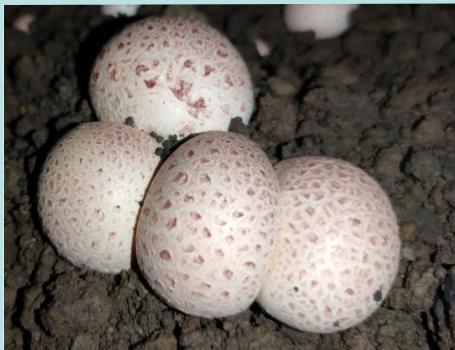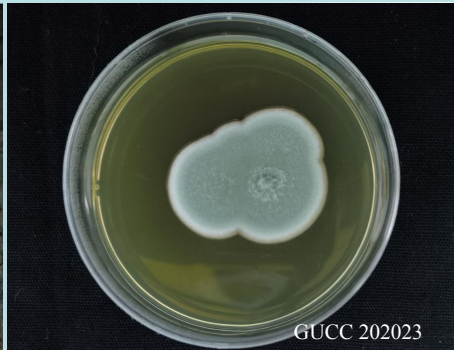

GUCC 202023

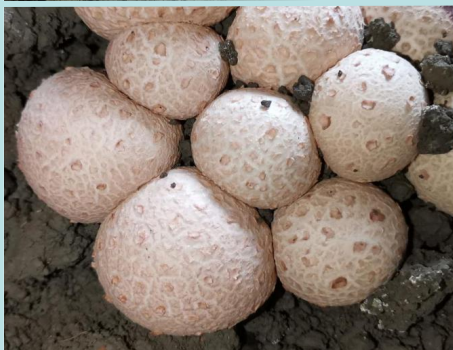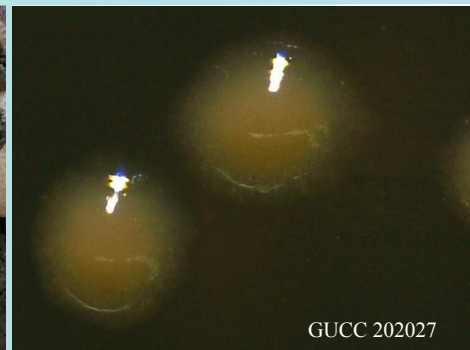

GUCC 202027

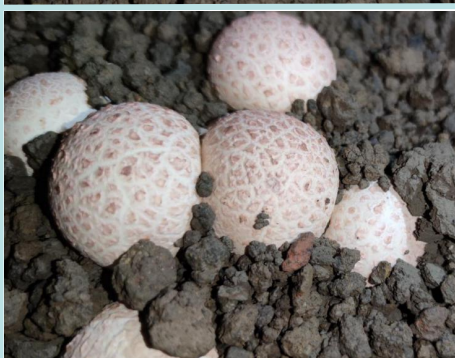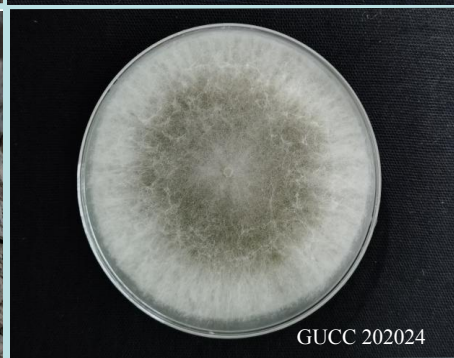

GUCC 202024

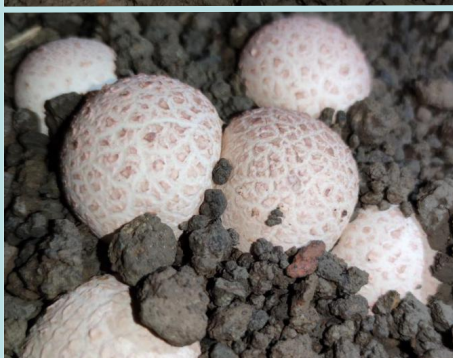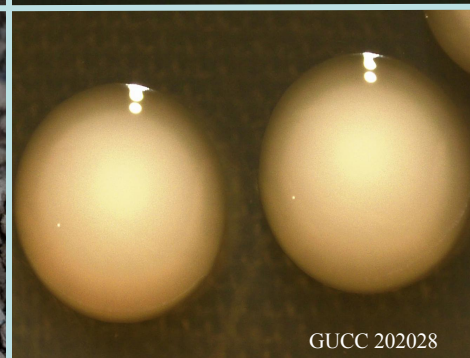

GUCC 202028

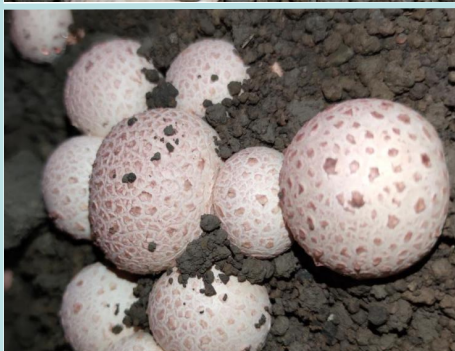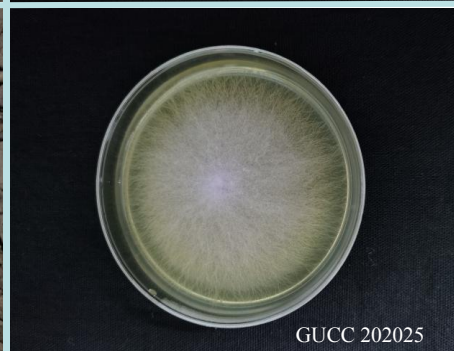

GUCC 202025

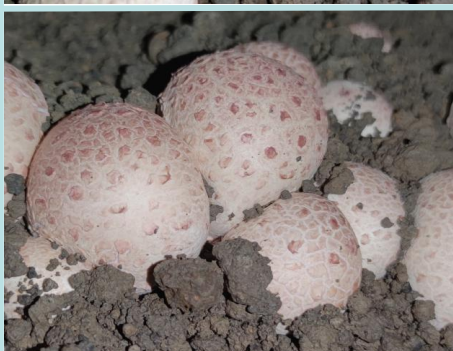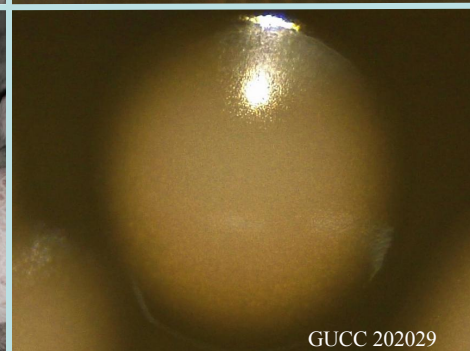

GUCC 202029



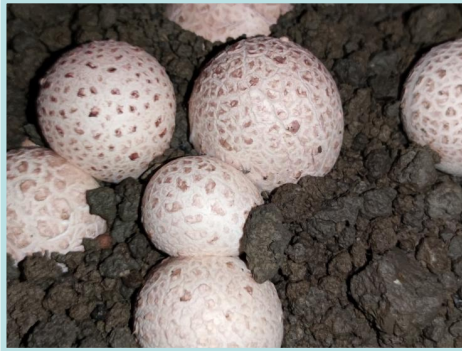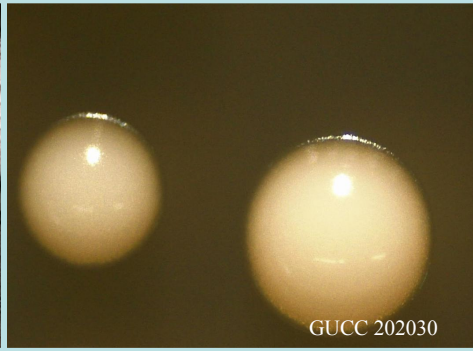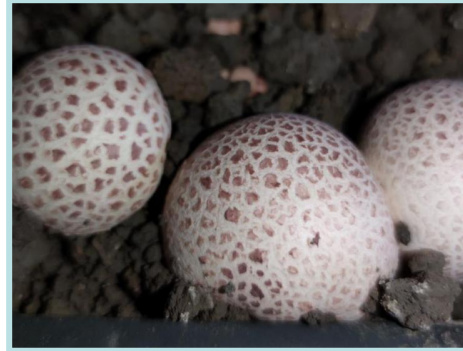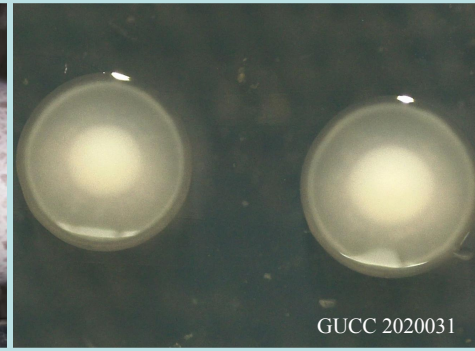

Supplement: s1 [file s1]
